# Supplementary material
Source: PubMed Central journal article supplement (PMC8752152)
Supplement: aem.01515-21-s0001.pdf [file aem.01515-21-s0001.pdf]

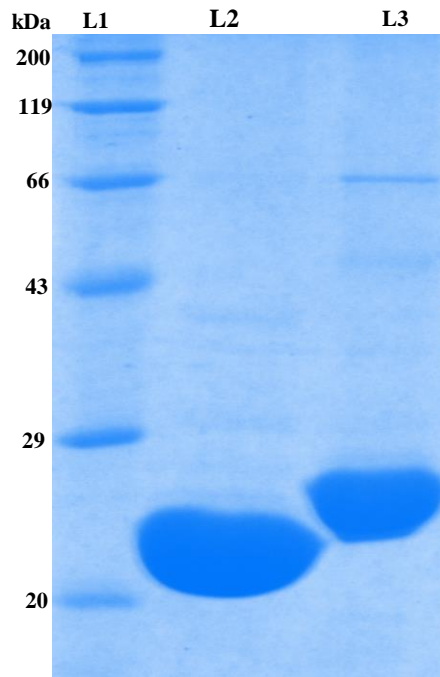

**Figure S1:** SDS-PAGE analysis of purified fractions of overexpressed LysMK34 (L2) and **eLysMK34** (L3). Roti<sup>®</sup>-Mark standard (Carl-Roth, Belgium) was used as a ladder (L1).

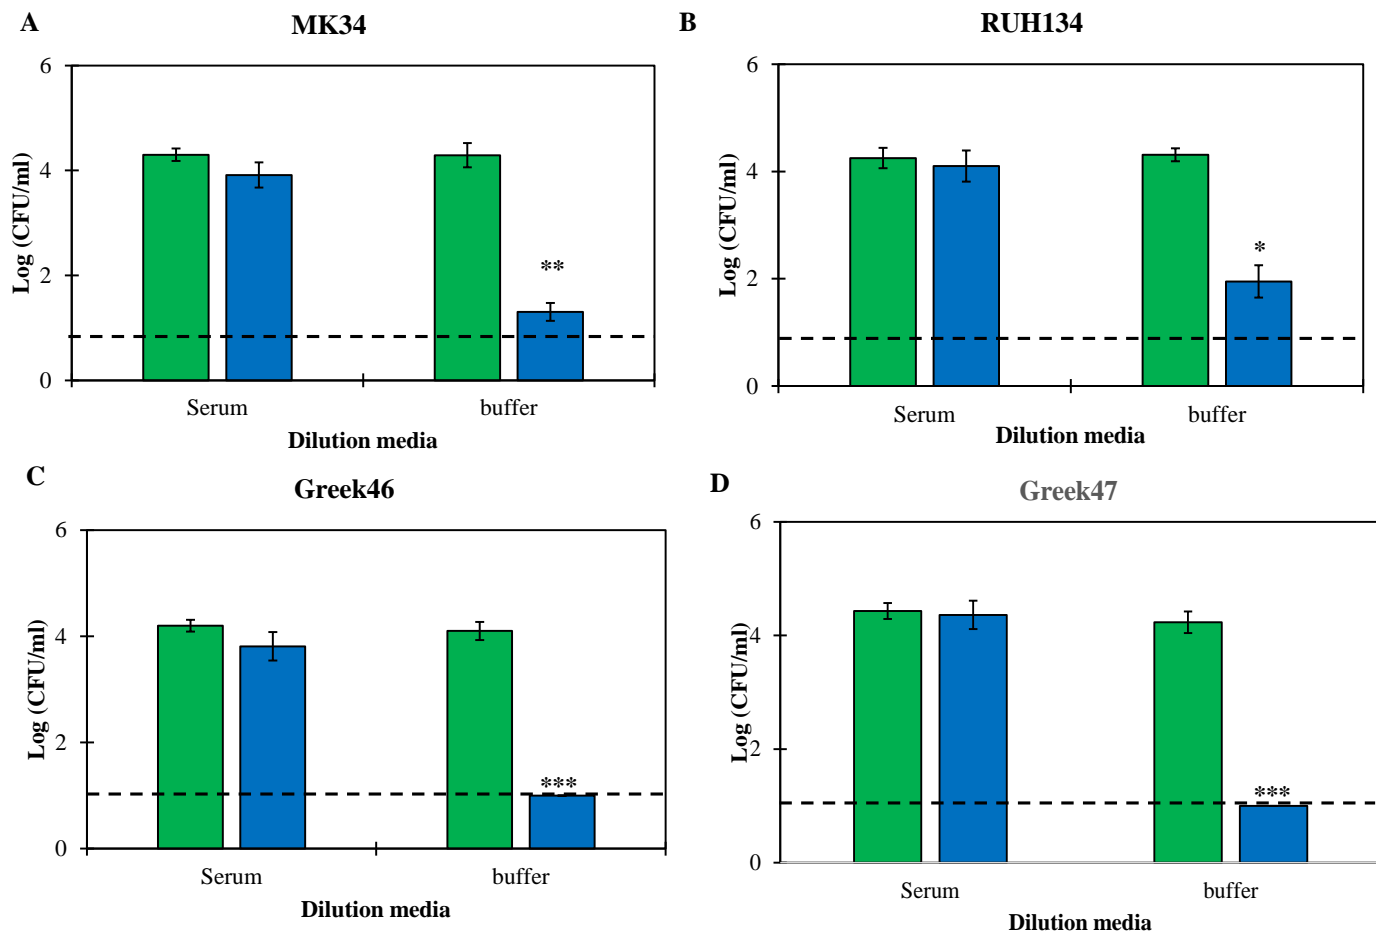

**Figure S2:** Time-kill assay of different *A. baumannii* strains (MK34 (A), RUH134 (B), Greek46 (C) and Greek47 (D) resuspended 100 % human serum. The suspended cells then treated with equal-volume of eLysMK34 to obtain a final concentration of  $20 \times \text{MIC}$  ( $15 - 24 \mu\text{M}$ ; blue bar) or plain dialysis buffer (green bar) for 2 h at  $35^\circ\text{C}$ . Then, the treated cells washed twice and resuspended in 100 % human serum. Prior to plating, the treated cells either diluted in 100 % human serum (left) or 20 mM HEPES-NaOH pH 7.4 (right). Each value represents the mean  $\pm$  standard deviation of three independent replicates. Asterisks represent statistical differences compared to buffer-treated cells (Student's *t*-test; \* $p < 0.05$ , \*\* $p < 0.01$  \*\*\* $p < 0.001$ ). The dashed line represents the limit of detection (10 CFU/ml).
